# Supplementary material
Source: publisher figshare collection journal article supplement (https://acs.figshare.com/ndownloader/files/26589227)
Supplement: Supplementary file 1 [file 26589227]

## Supporting information

### Reduction-Induced Synthesis of Reduced Graphene Oxide-Wrapped Cu<sub>2</sub>O/Cu Nanoparticles for Photodegradation of Methylene Blue

*K D R N Kalubowila<sup>1</sup>, M Siyath Gunewardene<sup>1</sup>, J. Lakmini Kaushalya Jayasingha<sup>2,3</sup>, Dhammike Dissanayake<sup>4</sup>, Charith Jayathilaka<sup>5</sup>, J.M. Dilushan Jayasundara<sup>1</sup>, Yun Gao<sup>3</sup> and J.K.D. Sumedha Jayanetti<sup>1,2\*</sup>*

<sup>1</sup>Department of Physics, University of Colombo, Colombo 03, Sri Lanka

<sup>2</sup>Department of Instrumentation & Automation Technology, University of Colombo, Homagama, Sri Lanka

<sup>3</sup>Ministry of Education Key Laboratory for the Green Preparation and Application of Fundamental Materials, School of Materials Science & Engineering, Hubei University, Wuhan, 430062, China

<sup>4</sup>Department of Chemistry, University of Colombo, Colombo 03, Sri Lanka

<sup>5</sup>Department of Physics, University of Kelaniya, Kelaniya, Sri Lanka

\*E-mail: sumedhajayanetti@gmail.com

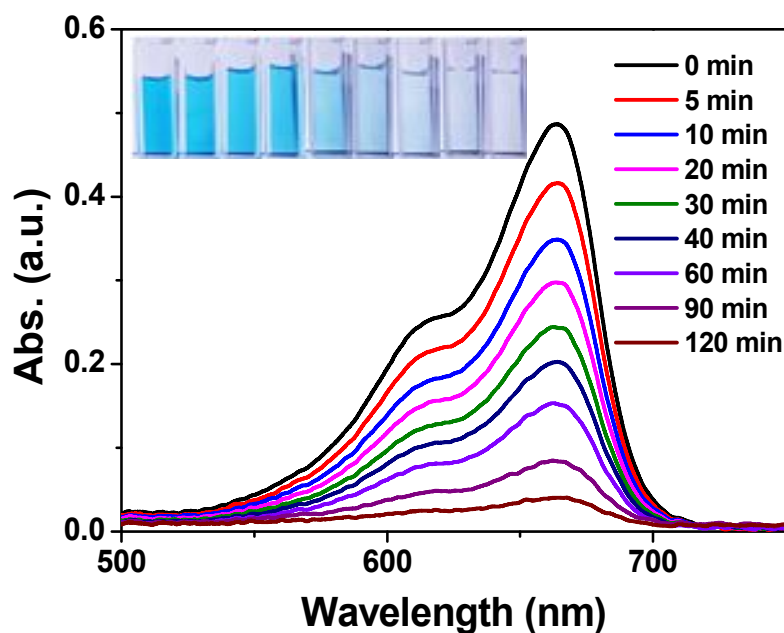

**Figure S1** Absorption spectra of Cu<sub>2</sub>O/rGO composites having the reducing duration of 30 min and the inset shows the digital photographs of MB solution when irradiated to light with Cu<sub>2</sub>O/rGO composite produced at 30 min of reducing duration with ascorbic acid from the beginning to 120 min

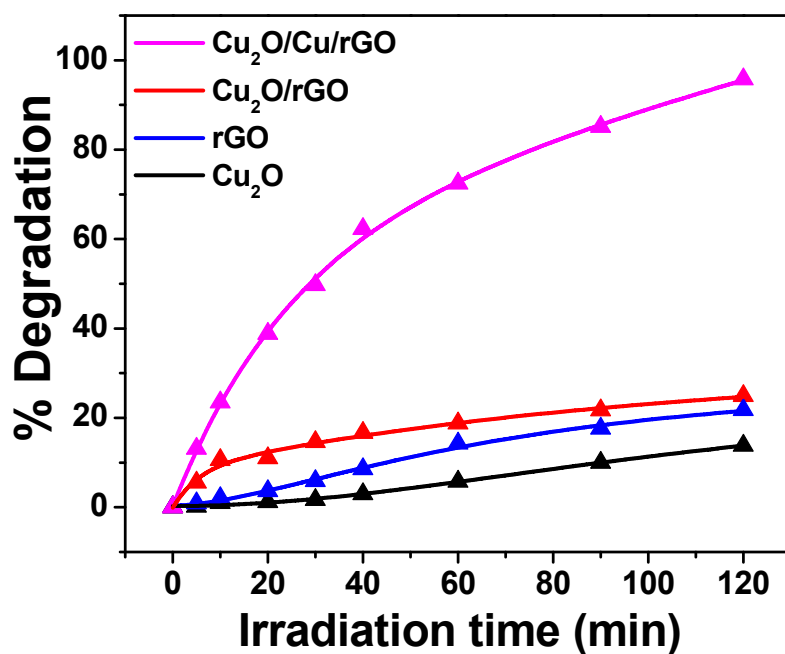

**Figure S2** Percentage degradation of MB under the irradiation of visible light with Cu<sub>2</sub>O, rGO, Cu<sub>2</sub>O/rGO and Cu<sub>2</sub>O/Cu/rGO and composite

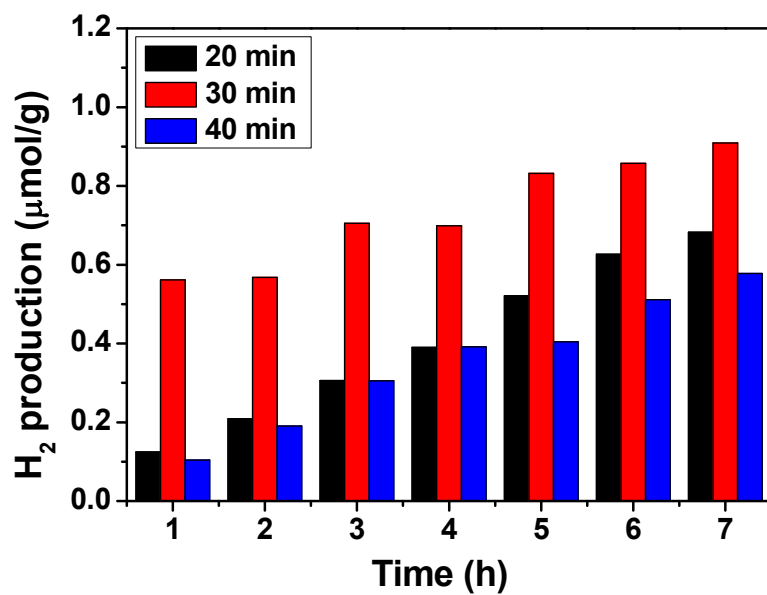

**Figure S3** H<sub>2</sub> evolution rate of the Cu<sub>2</sub>O/Cu/rGO composite synthesized at different reduction durations (20, 30, 40 min)

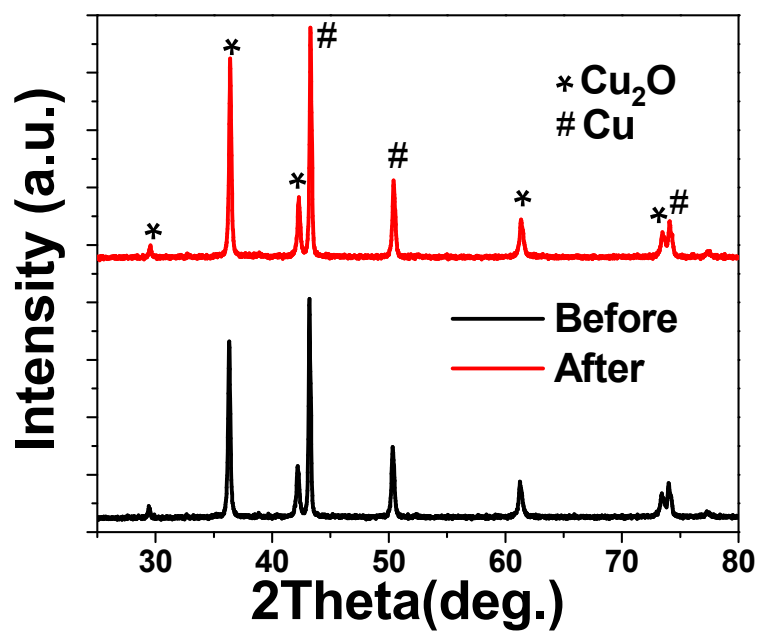

**Figure S4** XRD patterns of chemically synthesized Cu<sub>2</sub>O/Cu/rGO nanocomposite before and after the H<sub>2</sub> evolution process (irradiation time was 8 hrs.)
